# Supplementary material for: Design of Hierarchical Nickel-Cobalt Phosphide/Nickel Oxide with Tunable Electronic Structure and Strong Chemical Interface for Advanced Supercapacitors
Source: MDPI journal article supplement (doi:10.3390/batteries9120584), 2023-12-12
Supplement: s1 [file s1]

## Supporting Information

### Design of hierarchical NiCoP/NiO with tunable electronic structure and strong chemical interface for advanced supercapacitors

Gaini Zhang<sup>a,b</sup>, Jingqian Liu<sup>a,b</sup>, Hui Shan<sup>c\*</sup>, Zhengdong Ma<sup>a,b</sup>, Yuhui Xu<sup>a,b</sup>, Zihao Yang<sup>a,b</sup>, Jiaxuan Zuo<sup>a,b</sup>, Jingjing Wang<sup>a,b</sup>, Shufeng Li<sup>d\*</sup>, Xifei Li<sup>a,b\*</sup>

<sup>a</sup> Shaanxi International Joint Research Center of Surface Technology for Energy Storage Materials, Xi'an Key Laboratory of New Energy Materials and Devices, Institute of Advanced Electrochemical Energy & School of Materials Science and Engineering, Xi'an University of Technology, Xi'an 710048, Shaanxi, China.

<sup>b</sup> Key Laboratory of Advanced Batteries Materials for Electric Vehicles of China Petroleum and Chemical Industry Federation, Xi'an University of Technology, Xi'an 710048, Shaanxi, China.

<sup>c</sup> Key Laboratory of Magnetic Molecules and Magnetic Information Materials (Ministry of Education), School of Chemistry and Material Science, Shanxi Normal University, Taiyuan 030031, China

<sup>d</sup> Xi'an Key Laboratory of Advanced Powder Metallurgy Materials and New Technology, Xi'an University of Technology, Xi'an 710048, Shaanxi, China.

\*Correspondence should be addressed to:

Hui Shan, Shufeng Li, Xifei Li

Xi'an Key Laboratory of New Energy Materials and Devices,

School of Materials Science and Engineering,

Xi'an University of Technology, Xi'an, Shaanxi, 710048, China

E-mail: shanhuimei1991@126.com, shufengli@xaut.edu.cn, xfli2011@hotmail.com (X. Li)

## 1. Chemicals

All the chemical reagents with analytical grade utilized directly without any treatment. Sodium hydroxide (NaOH), ammonium persulphate ((NH<sub>4</sub>)<sub>2</sub>S<sub>2</sub>O<sub>8</sub>), cobaltous nitrate hexahydrate (Co(NO<sub>3</sub>)<sub>2</sub>·6H<sub>2</sub>O), nickel nitrate hexahydrate (Ni(NO<sub>3</sub>)<sub>2</sub>·6H<sub>2</sub>O) and sodium hypophosphite (NaH<sub>2</sub>PO<sub>2</sub>·H<sub>2</sub>O) were supplied by Sinopharm Chemical Reagents Co., Ltd. **Porous activated carbon (PAC, C196579) purchased from Aladdin.** Nickel foam (NF) were purchased from Suzhou Keshenghe Metal Materials Co., Ltd.

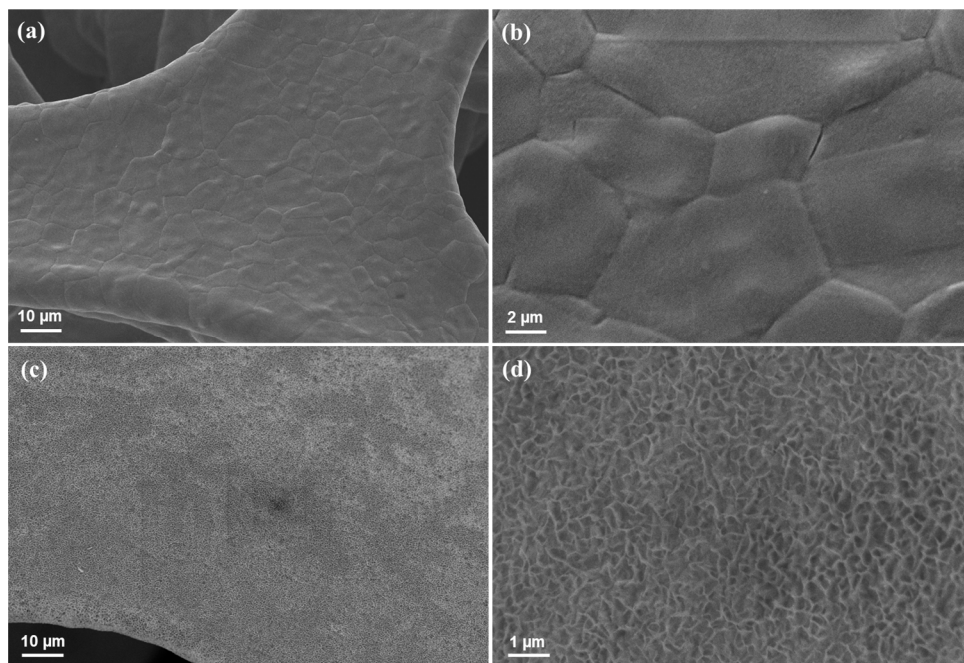

**Figure S1.** SEM images of (a, b) pure nickel foam and (c, d) NiO/NF at different magnifications.

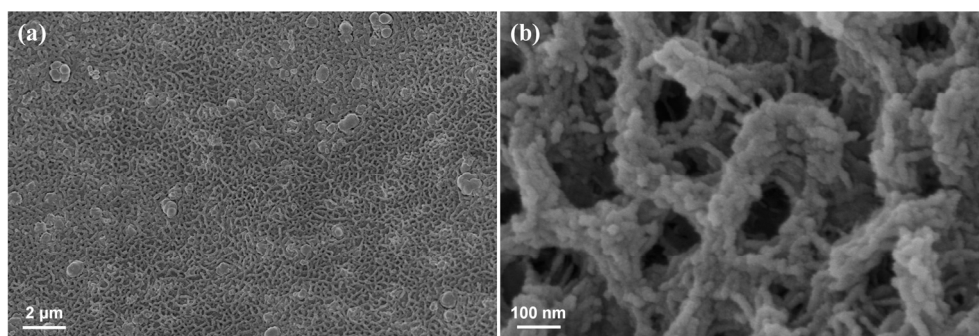

**Figure S2.** SEM images of NiCoP/NiO nanocomposites with **electrodeposition time of 15 min.**

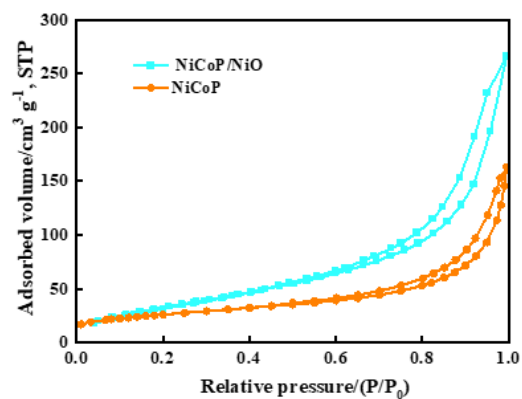

**Figure S3.**  $N_2$  adsorption-desorption isotherms of the NiO/NiCoP and NiCoP.

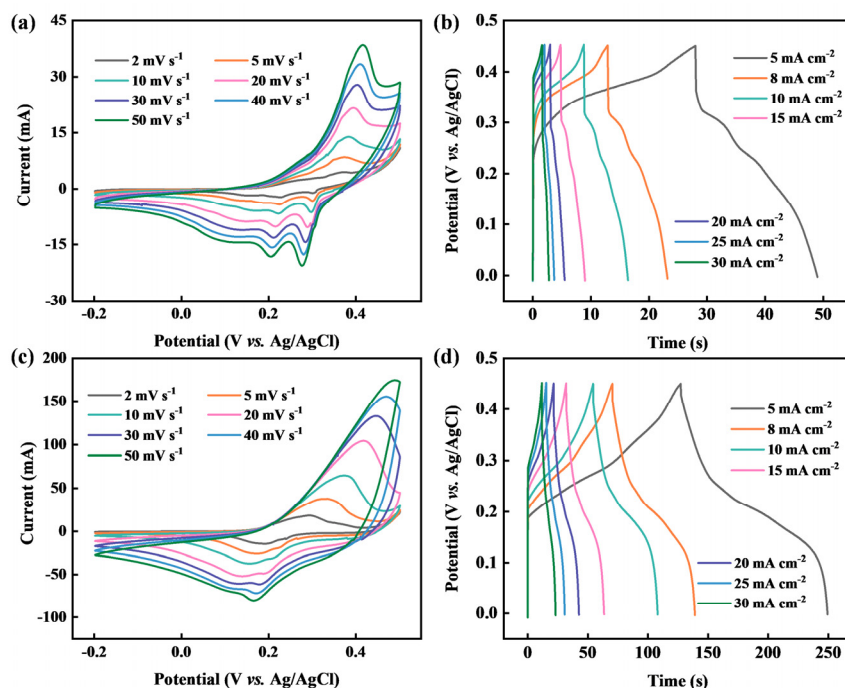

**Figure S4.** Electrochemical performance measured in a three-electrode system in 2.0 M KOH electrolyte: CV curves and GCD curves of the (a, b) NiO/NF and (c, d) NiCoP/NF electrodes, respectively.

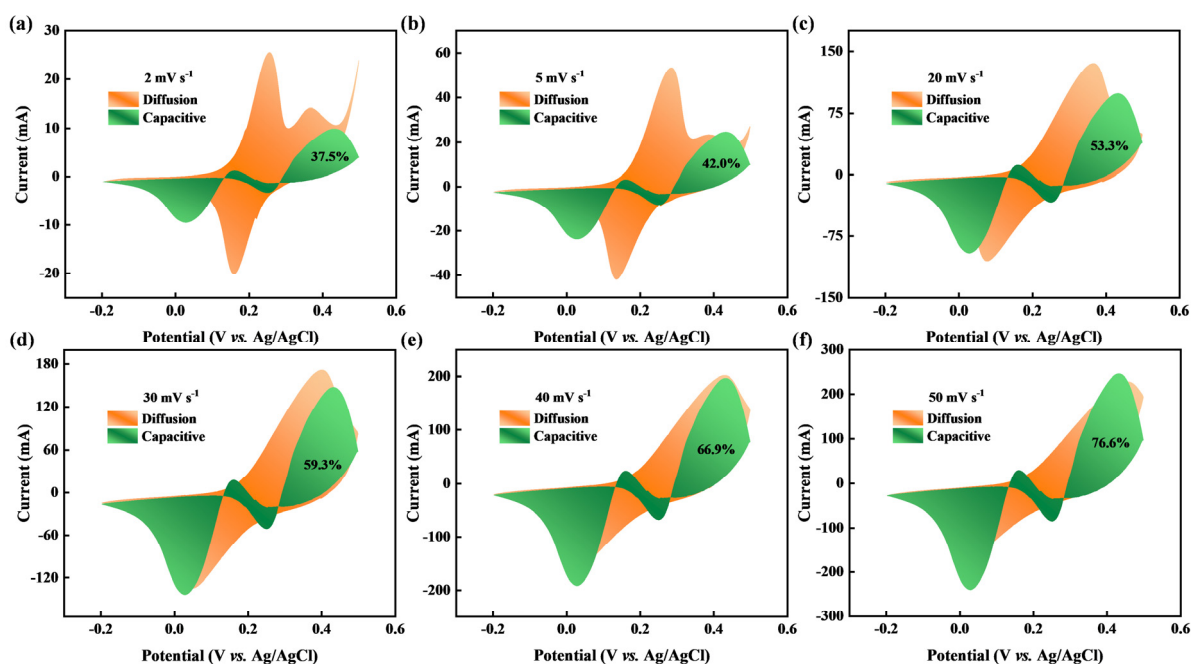

**Figure S5.** Separation of the surface and diffusion-controlled currents at different scan rates for the NiCoP/NiO electrode.

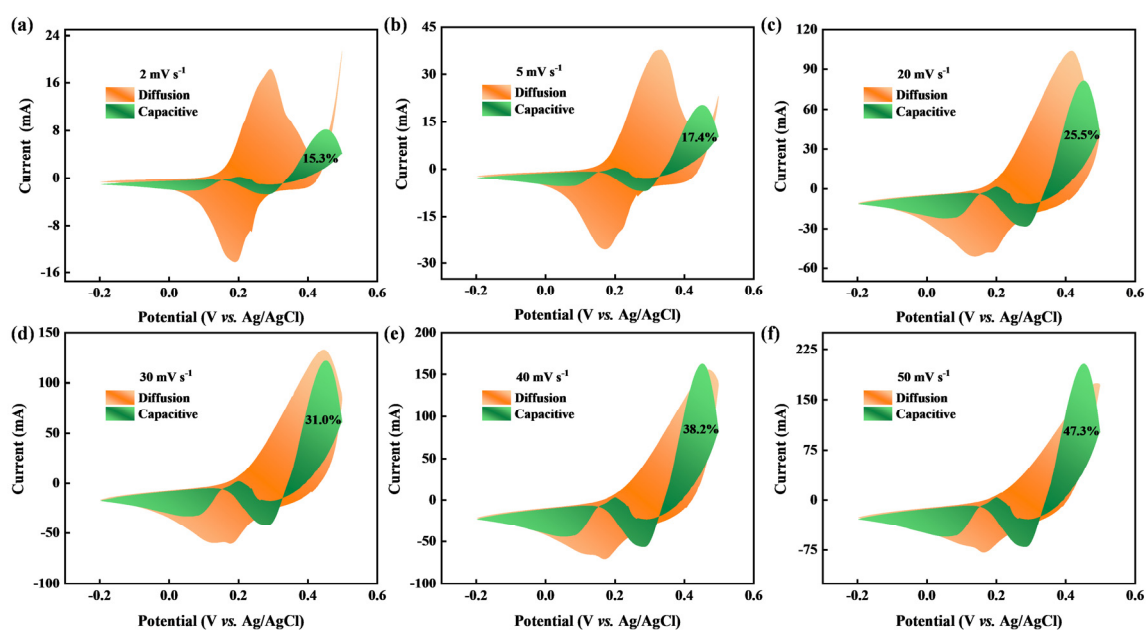

**Figure S6.** Separation of the surface and diffusion-controlled currents at different scan rates for the NiCoP/NF electrode.

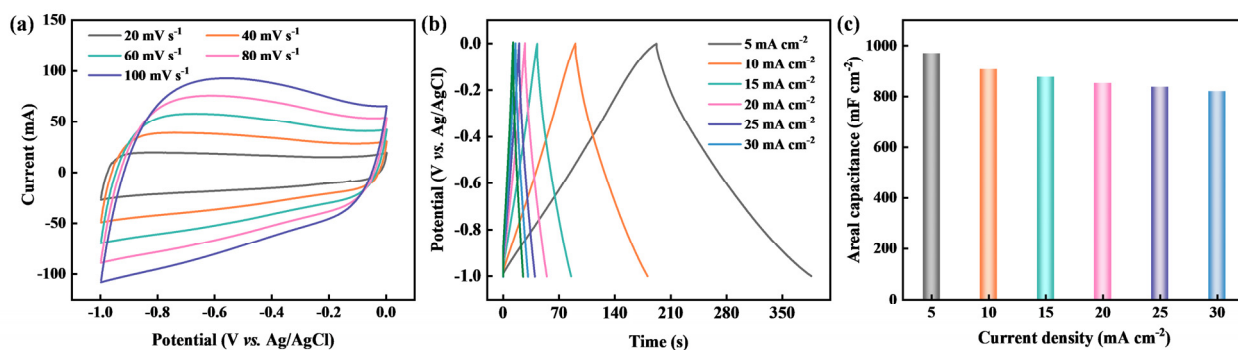

**Figure S7.** (a) CV curves, (b) GCD curves, and (c) areal specific capacitance of the PAC electrode.

**Table S1.** Comparative electrochemical performance of nickel-cobalt based nanocomposite materials reported by the literature.

| Devices                                                                                                  | Voltage (V) | Energy density ( $\mu\text{Wh}/\text{cm}^2$ ) | Power density ( $\text{mW}/\text{cm}^2$ ) | Cycling stability                        |
|----------------------------------------------------------------------------------------------------------|-------------|-----------------------------------------------|-------------------------------------------|------------------------------------------|
| NF/NiO/NiCo <sub>2</sub> S <sub>4</sub> //AC/NF <sup>[1]</sup>                                           | 1.2         | 25.4                                          | 0.782                                     | 90%<br>(20 mA cm <sup>-2</sup> , 2000 C) |
| NiCo <sub>2</sub> S <sub>4</sub> @NiCoP/NF//AC <sup>[2]</sup>                                            | 1.5         | 135                                           | 0.755                                     | /                                        |
| NiCo <sub>2</sub> S <sub>4</sub> @CNT//Ti <sub>3</sub> C <sub>2</sub> T <sub>x</sub> @CCT <sup>[3]</sup> | 1.5         | 180                                           | 2                                         | 87%<br>(/, 2000 C)                       |
| NiCo <sub>2</sub> O <sub>4</sub> NG@CF//PC@CF <sup>[4]</sup>                                             | 1.65        | 9.46                                          | 0.6084                                    | 92%<br>(2 mA cm <sup>-2</sup> , 3000 C)  |
| Co <sub>0.8</sub> Ni <sub>0.2</sub> Se <sub>2</sub> //AC <sup>[5]</sup>                                  | 1.8         | 71                                            | 0.75                                      | 48%<br>(1 mA cm <sup>-2</sup> , 8000 C)  |
| Ni <sub>a</sub> Co <sub>b</sub> S@NF//AC <sup>[6]</sup>                                                  | 1.2         | 1.25                                          | 6                                         | 88%<br>(/, 6500 C)                       |
| NiCoP/NiO//PAC(This work)                                                                                | 1.6         | 173.7                                         | 1.6                                       | 74%<br>(40 mA cm <sup>-2</sup> , 5000 C) |

CNT: carbon nanotube film, CCT: carbon cloth threads, NG: nanograss, PC: porous carbon

## References

- [1] O. Moradlou, H. Sharifpour, Interconnected NiCo<sub>2</sub>S<sub>4</sub>-coated NiO nanosheet arrays as electrode materials for high-performance supercapacitors, *J. Energy Storage* 32 (2020) 101886.
- [2] X. Chang, W. Li, Y. Liu, M. He, X. Zheng, J. Bai, Z. Ren, Hierarchical NiCo<sub>2</sub>S<sub>4</sub>@NiCoP core-shell nanocolumn arrays on nickel foam as a binder-free supercapacitor electrode with enhanced electrochemical performance, *J. Colloid Interf. Sci.* 538 (2019) 34-44.
- [3] J. Yu, J. Zhou, P. Yao, J. Huang, W. Sun, C. Zhu, J. Xu, A stretchable high performance all-in-one fiber supercapacitor, *J. Power Sources* 440 (2019) 227150.
- [4] S.T. Senthilkumar, N. Fu, Y. Liu, Y. Wang, L. Zhou, H. Huang, Flexible fiber hybrid supercapacitor with NiCo<sub>2</sub>O<sub>4</sub> nanograss@carbon fiber and bio-waste derived high surface area porous carbon, *Electrochim. Acta* 211 (2016) 411-419.
- [5] P. Sheng, R. Ye, D. Wu, L. Zhang, X. An, S. Tao, B. Qian, P.K. Chu, Morphological modulation of cobalt selenide on carbon cloth by Ni doping for high-performance electrodes in supercapacitors, *Colloids Surf. A Physicochem. Eng. Asp* 624 (2021) 126818.
- [6] S.-H. Chou, L.-Y. Lin, Y.-H. Chiu, Pulse reverse electrodeposited nickel cobalt sulfide nanosheets on Ni foam as battery-type electrode for battery supercapacitor hybrids, *J. Energy Storage* 25 (2019) 100903.
