# Supplementary material for: Design of Hierarchical Nickel-Cobalt Phosphide/Nickel Oxide with Tunable Electronic Structure and Strong Chemical Interface for Advanced Supercapacitors
Source: MDPI journal article supplement (doi:10.3390/batteries9120584), 2023-12-12
Supplement: s1 [file s1]

Archive with 1 entries (1 files):
- batteries-2706326-supplementary.pdf
